# Supplementary material for: In-depth electronic behavior of pentagraphene and pentagonal silicene sheets for DNA nucleobase detection: implications for genetic biomarker sensing
Source: Royal Society of Chemistry journal article supplement (doi:10.1039/d4cp04344h), 2025-01-01
Supplement: d4cp04344h1.pdf [file d4cp04344h1.pdf]

**In-depth electronic behavior of pentagraphene and pentagonal-silicene sheets for DNA nucleic-base detection: implications for genetic biomarker sensing**

Arzoo Hassan,<sup>a</sup> Andleeb Mehmood,<sup>b</sup> Umer Younis,<sup>c</sup> Xiaoqing Tian<sup>a,\*</sup>

<sup>a</sup> College of Physics and Optoelectronic Engineering, Shenzhen University, Shenzhen 518060, China

<sup>b</sup> Institution for carbon neutrality, Zhejiang wanli university, Ningbo, Zhejiang 31500, China

<sup>c</sup> Department of Chemistry, Southern University of Science and Technology, Shenzhen, Guangdong, 518055, China

Email\*:

[xqtian@szu.edu.cn](mailto:xqtian@szu.edu.cn)

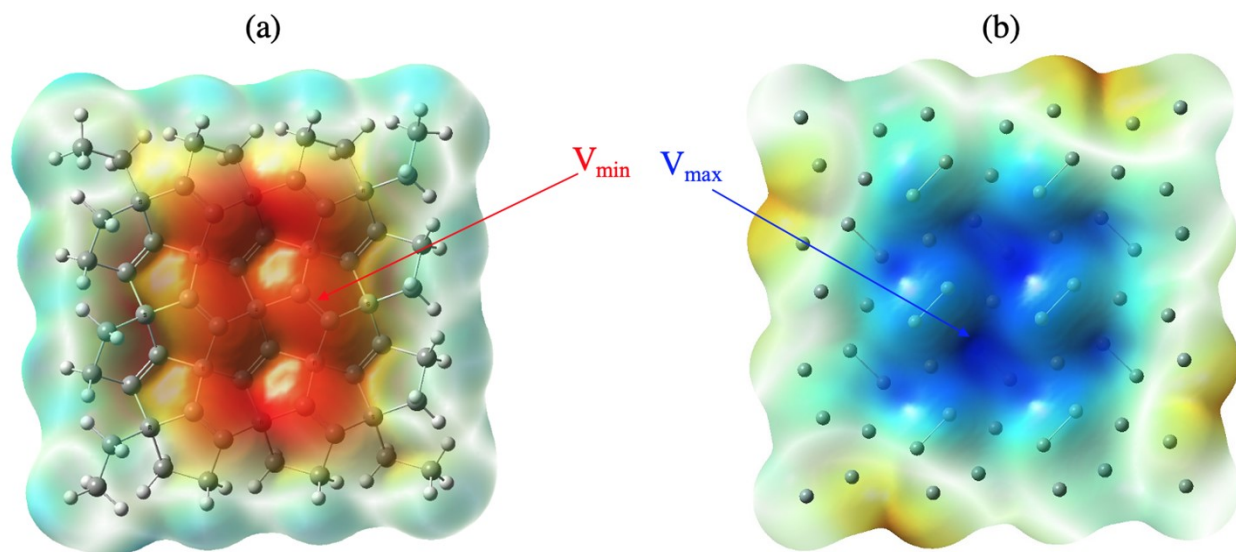

Fig. S1. MESP of the Substrates using the M062X/6-31G\* level of theory (a) Penta graphene (b) Penta-silicene. Red arrow and blue arrow show the location of maximum negative potential and maximum positive potential.

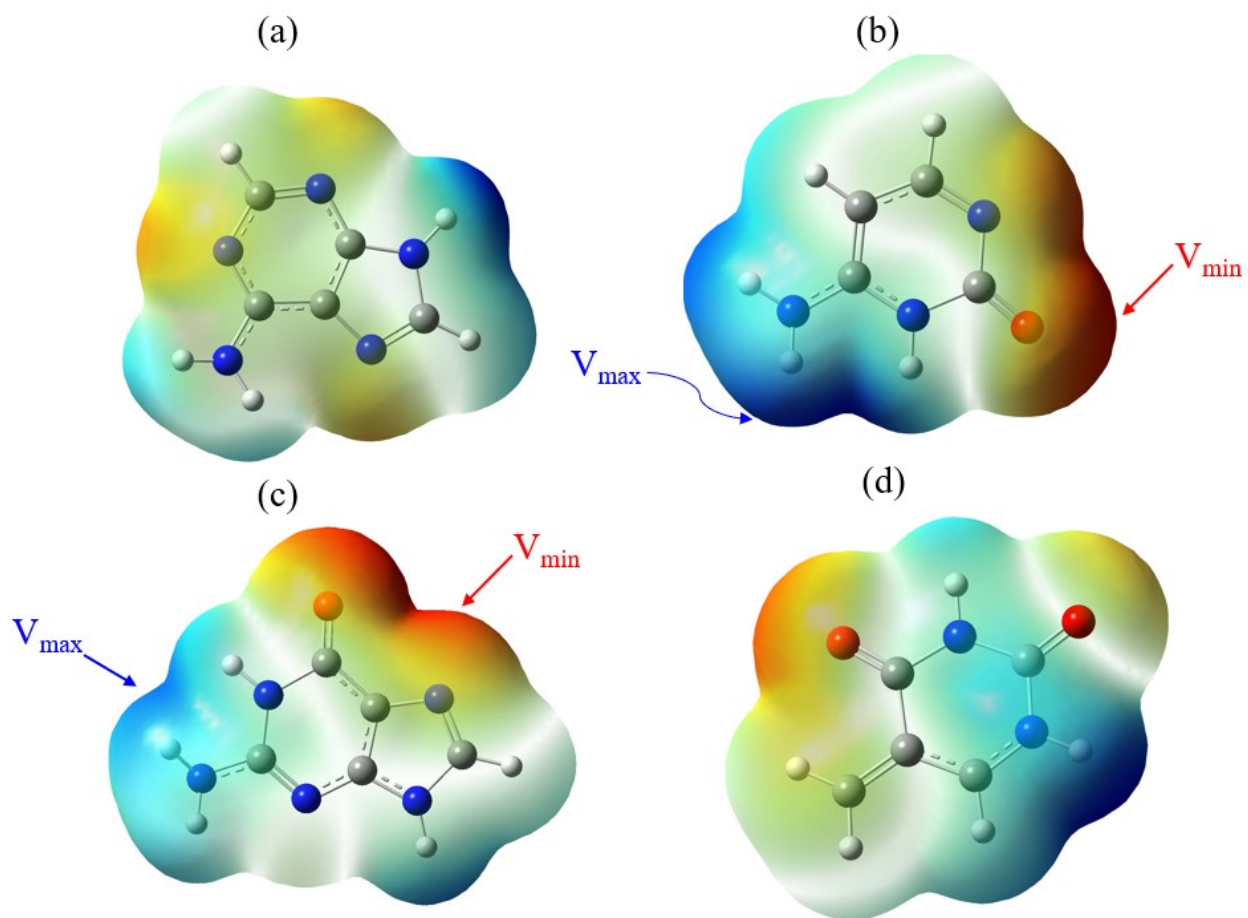

Fig S2. MESP of the DNA nucleic bases using the M062X/6-31G\* level of theory (a)Adenine (b) Guanine (c) Cytosine and (d) Thymine. Red arrow and blue arrow show the location of minimum negative potential ( $V_{\min}$ ) and maximum positive potential ( $V_{\max}$ ).

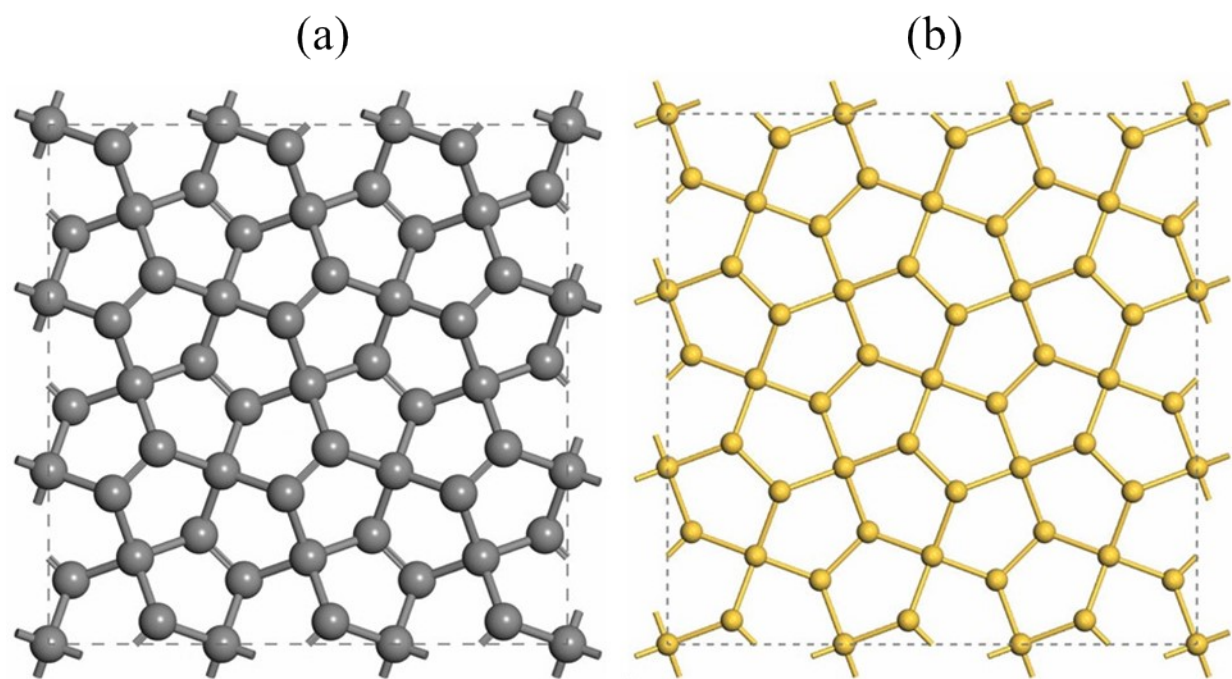

Fig S3. Optimized structures of (a) pentagraphene (PG) and (b) penta-silicene (p-Si). Grey sphere represent C atoms and yellow spheres represent Si atoms

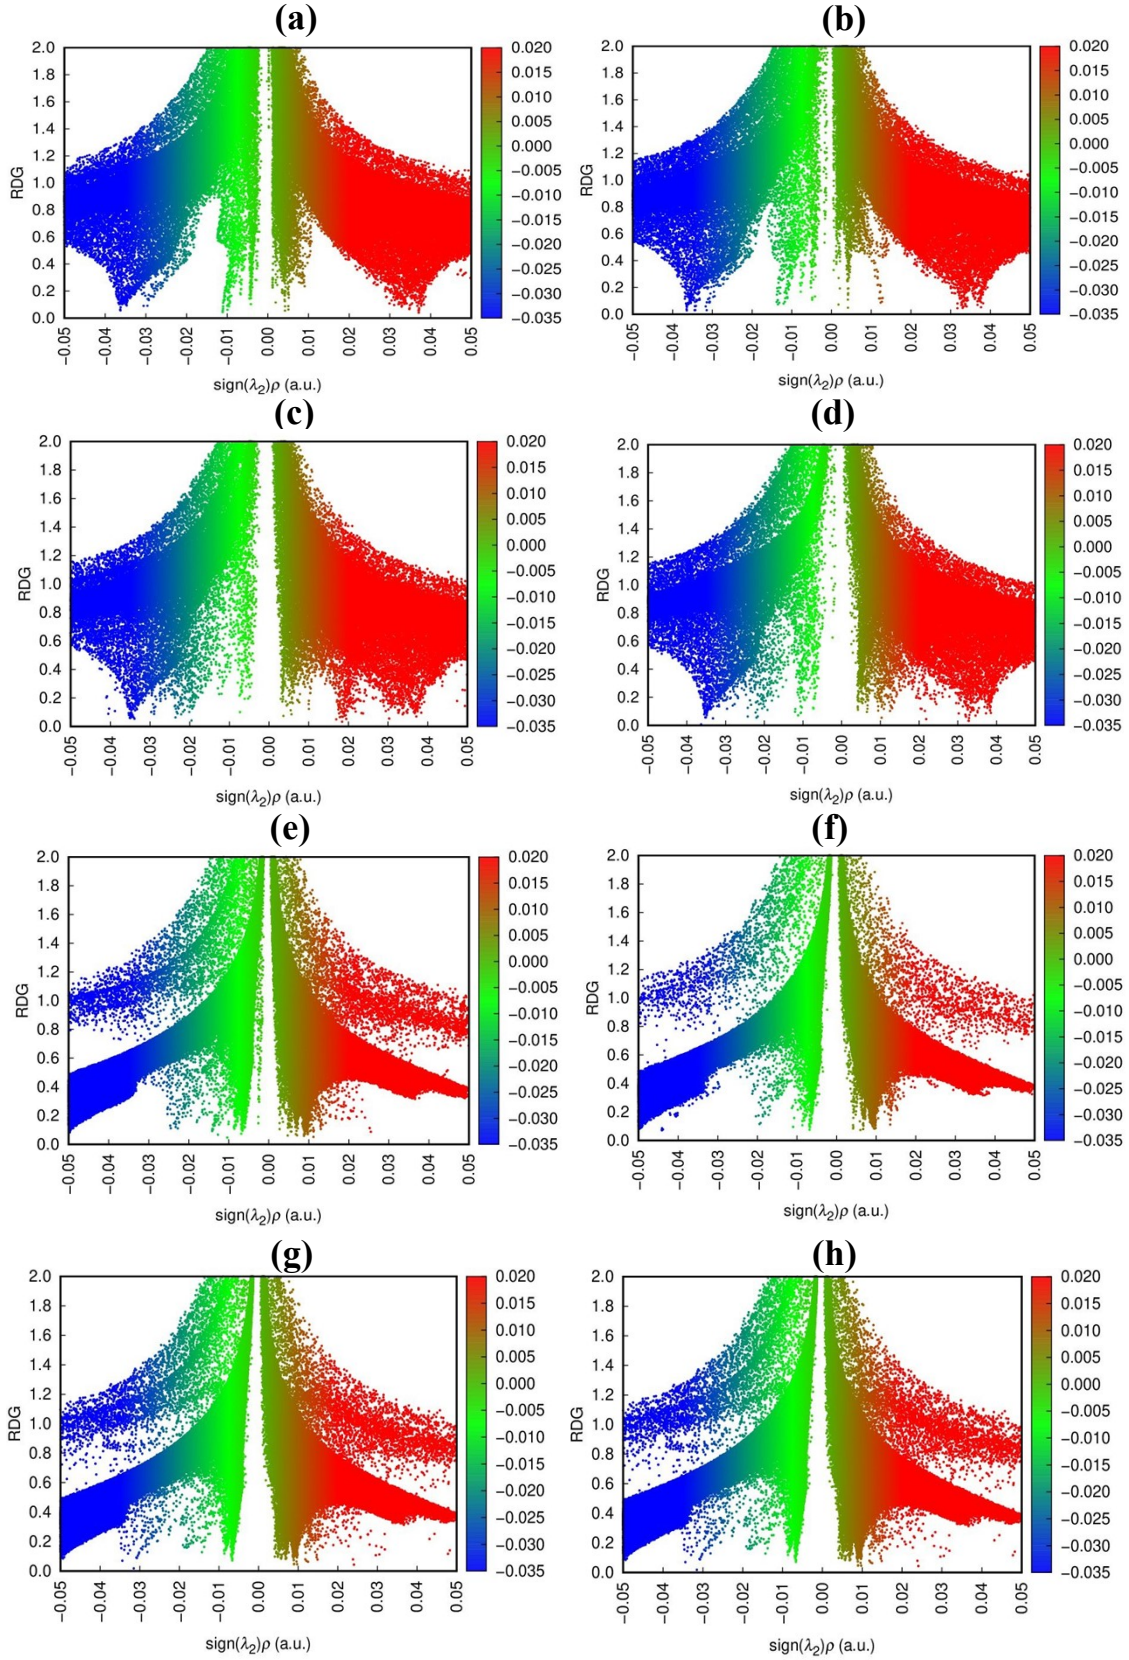

Fig. S4. The RDG scatter diagrams of the PG-nucleic base complexes with (a) adenine (b) cytosine (c) guanine (d) thymine and p-Si-nucleic base complexes with (e) adenine (f) cytosine (g) guanine (h) thymine. The iso-surfaces are colored according to the values of 0.5 a.u respectively.

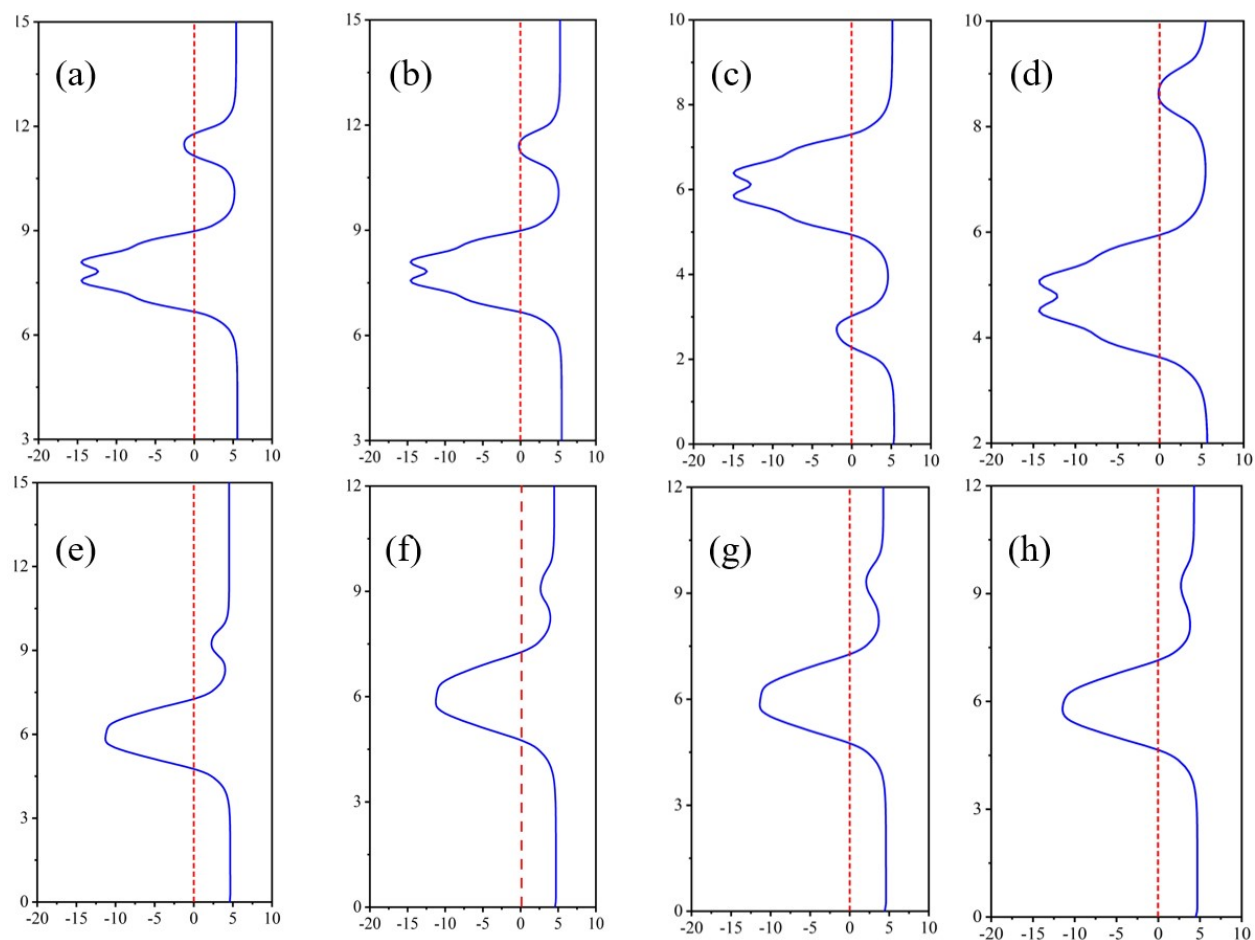

Fig. S5. Calculated electrostatic potential of the PG-nucleic base complexes with (a) adenine (b) cytosine (c) guanine (d) thymine and p-Si-nucleic base complexes with (e) adenine (f) cytosine (g) guanine (h) thymine.

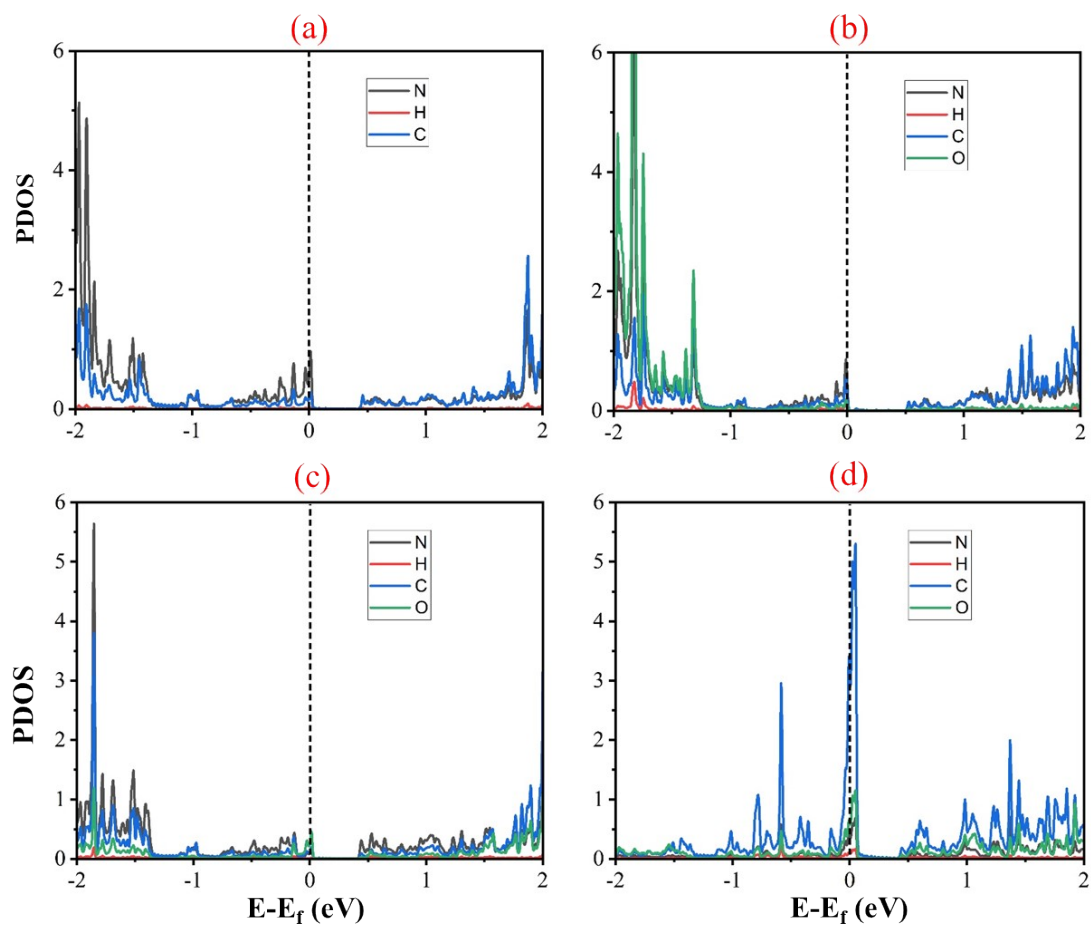

Figure S6. PDOS of (a) p-Si-Adenine (b) p-Si-Cytosine (c) p-Si-Guanine and (d) p-Si-Thymine.

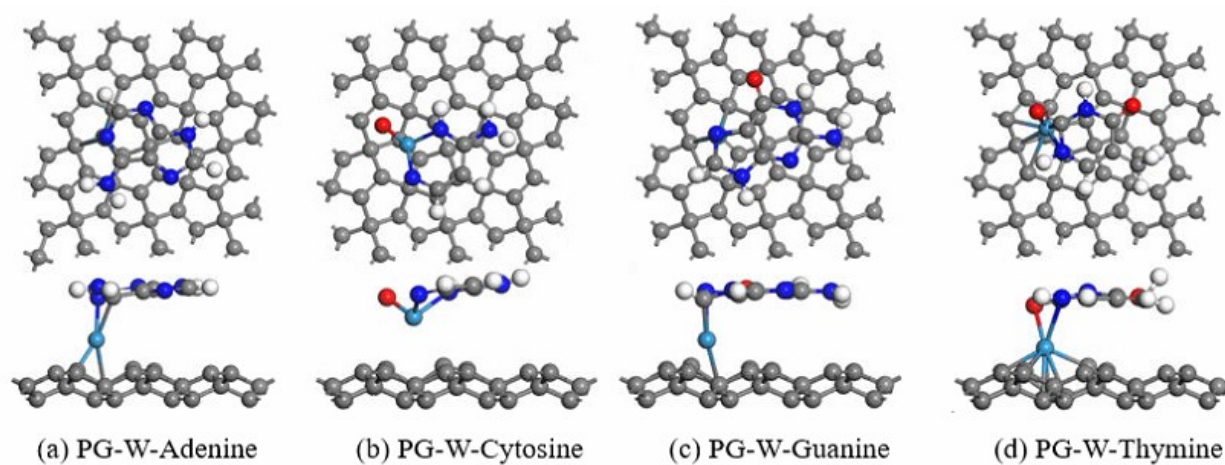

Fig. S7. Top and side views of the optimized configurations of single nucleobases (a: Adenine; b: Guanine; c: Cytosine; d: Thymine) on Tungsten (W) doped PG sheet. (gray sphere is C atom; white sphere is H atom; red sphere is O atom; blue sphere is N atom; Yellow sphere is Au atom).

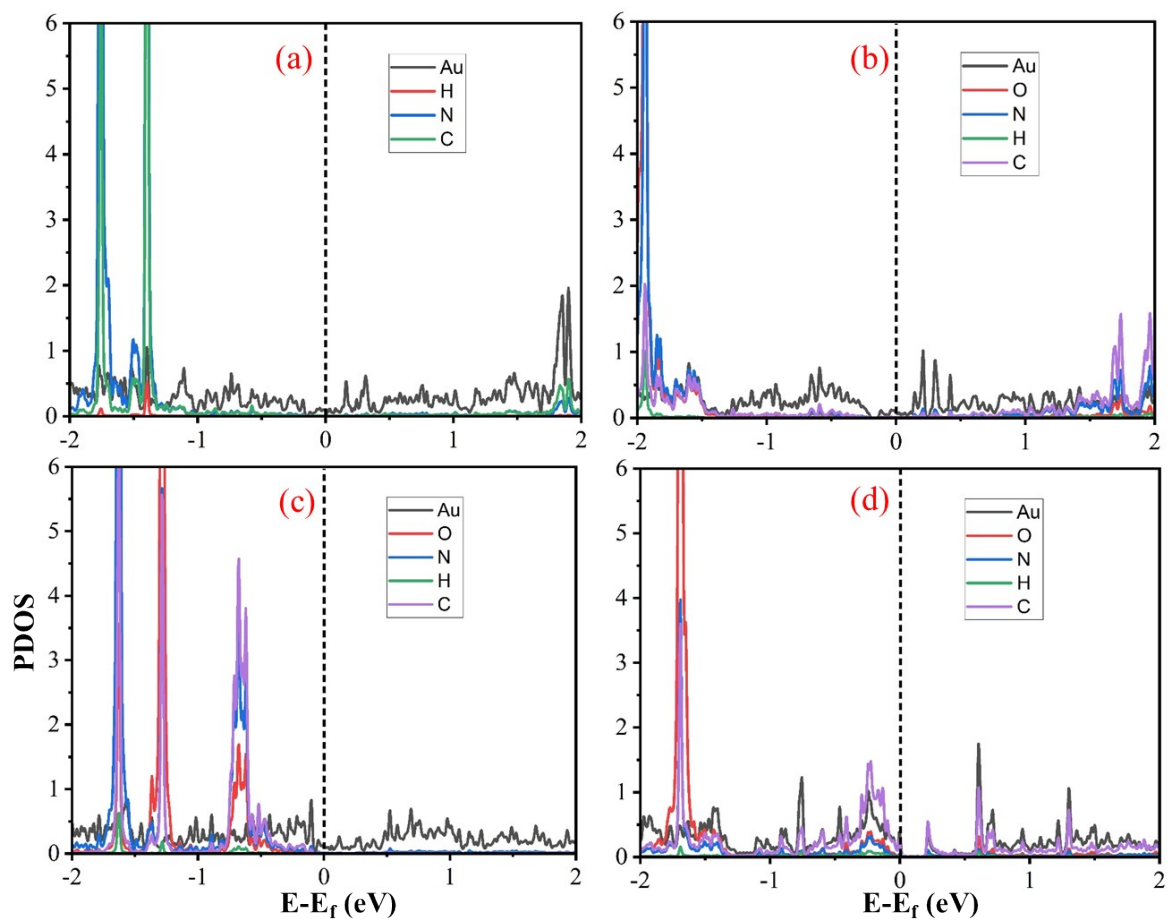

Figure S8. PDOS of (a) p-Si-Au-Adenine (b) p-Si-Au-Cytosine (c) p-Si-Au-Guanine and (d) p-Si-Au-Thymine.

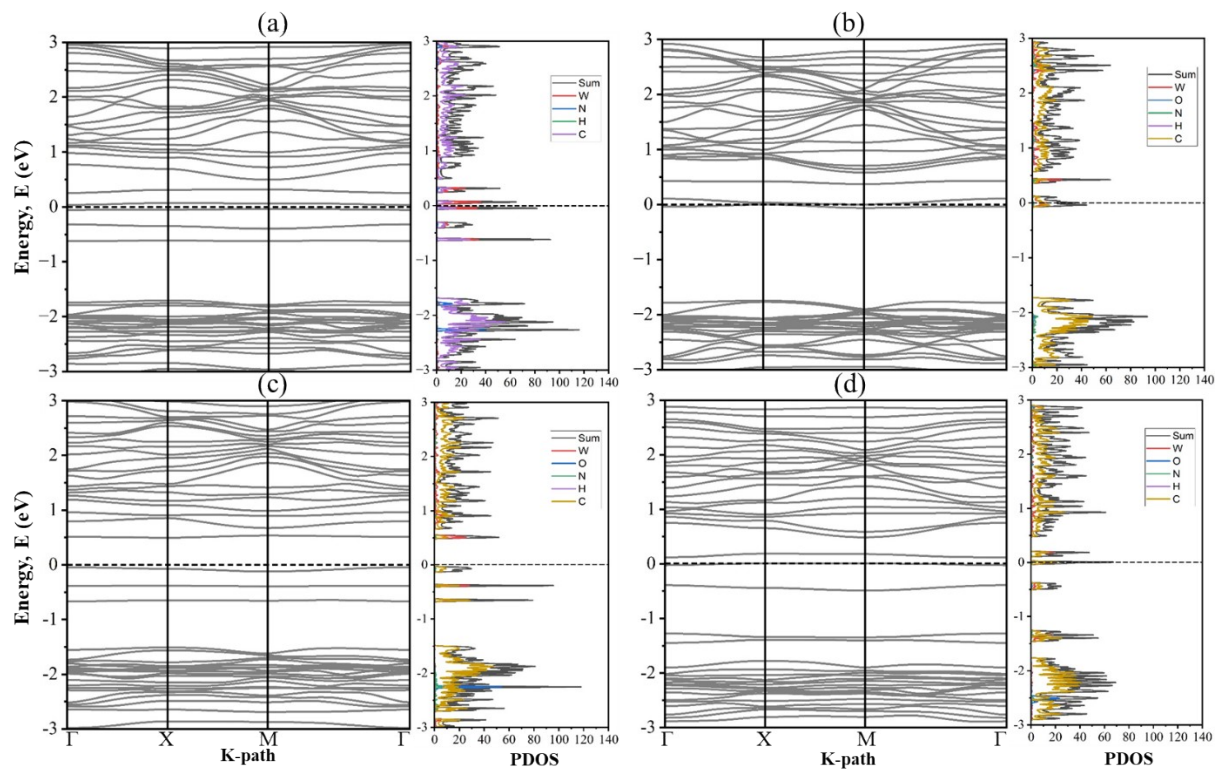

Fig. S9. Total electronic band structure and PDOS of (a) PG-W-Adenine (b) PG-W-Cytosine (c) PG-W-Guanine and (d) PG-W-Thymine

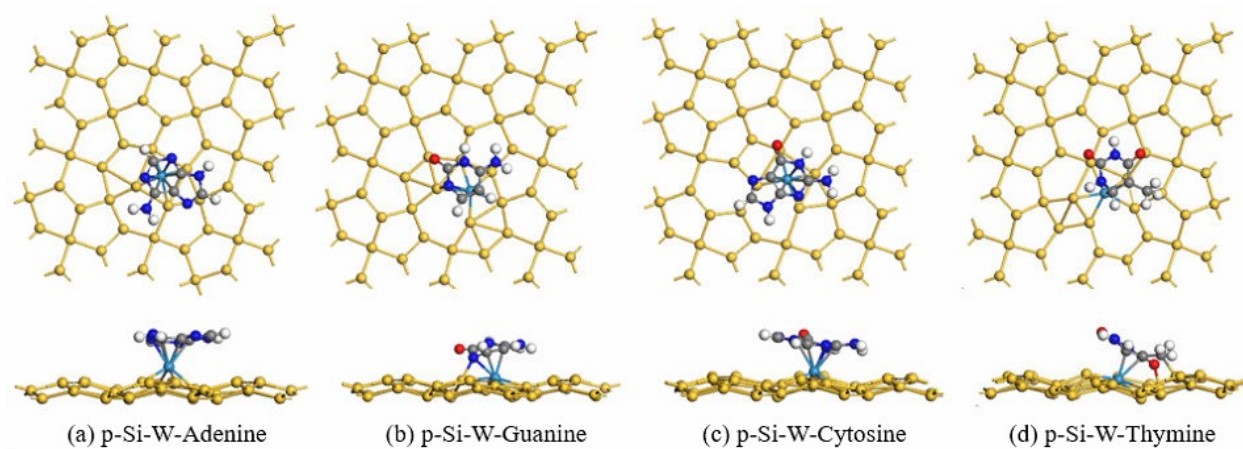

Fig. S10. Top and side views of the optimized configurations of single nucleobases (a: Adenine; b: Guanine; c: Cytosine; d: Thymine) on W doped p-Si sheet. (Yellow sphere is Si atom; white sphere is H atom; red sphere is O atom; blue sphere is N atom; cyan sphere is W atom).

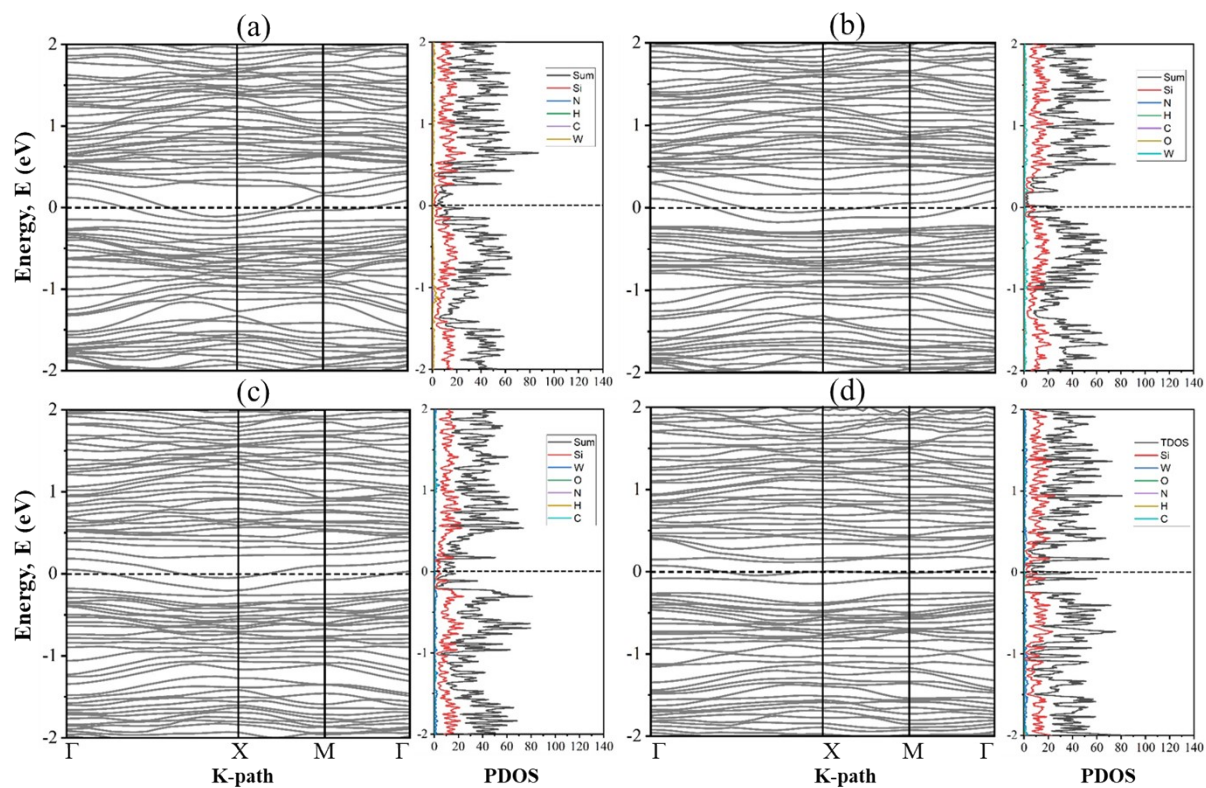

Fig. S11. Total electronic band structure and PDOS of (a) p-Si-W-Adenine (b) p-Si-W-Cytosine (c) p-Si-W-Guanine and (d) p-Si-W-Thymine.

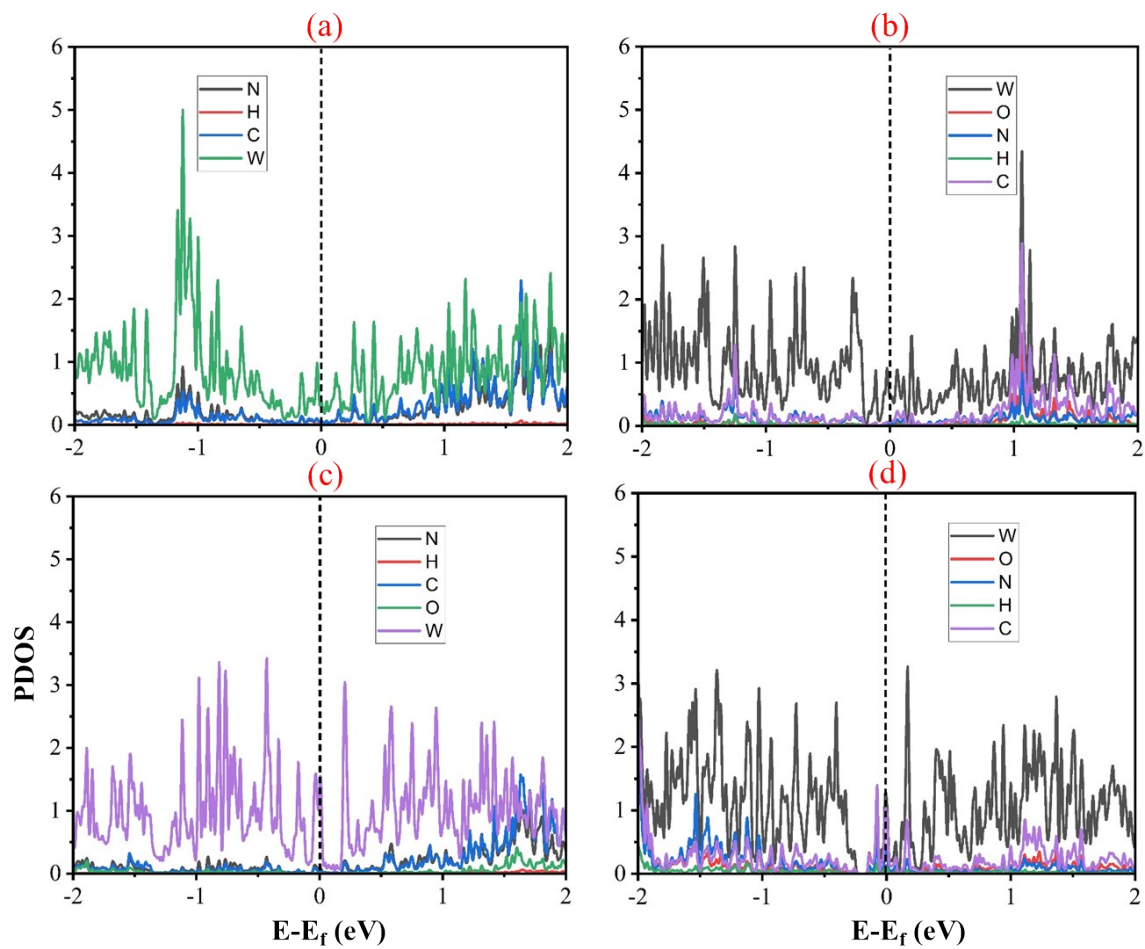

Figure S12. PDOS of (a) p-Si-W-Adenine (b) p-Si-W-Cytosine (c) p-Si-W-Guanine and (d) p-Si-W-Thymine.

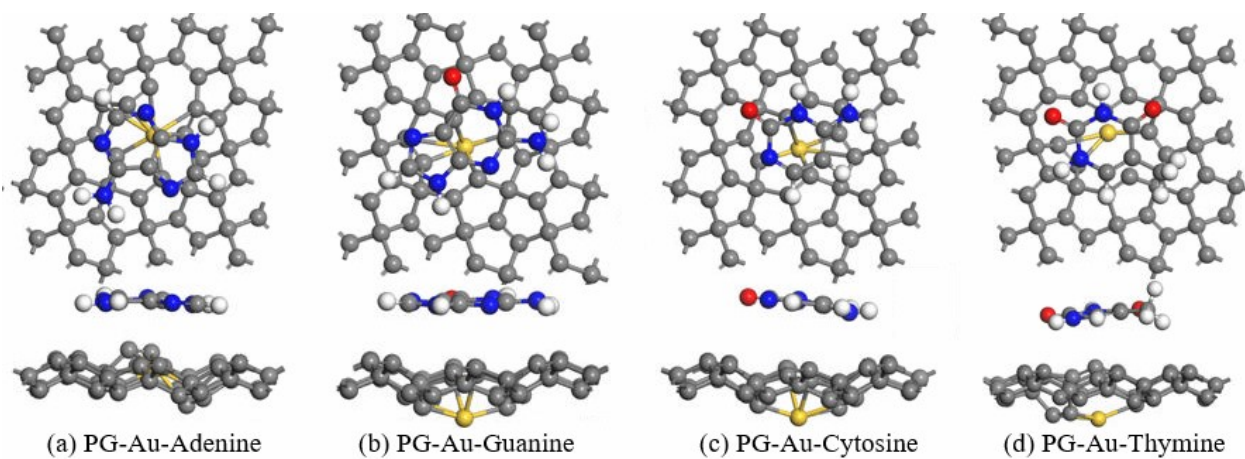

Fig. S13. Top and side views of the optimized configurations of single nucleobases (a: Adenine; b: Guanine; c: Cytosine; d: Thymine) on Tungsten (Au) functionalized PG sheet. (gray sphere is C atom; white sphere is H atom; red sphere is O atom; blue sphere is N atom; yellow sphere is Au atom).

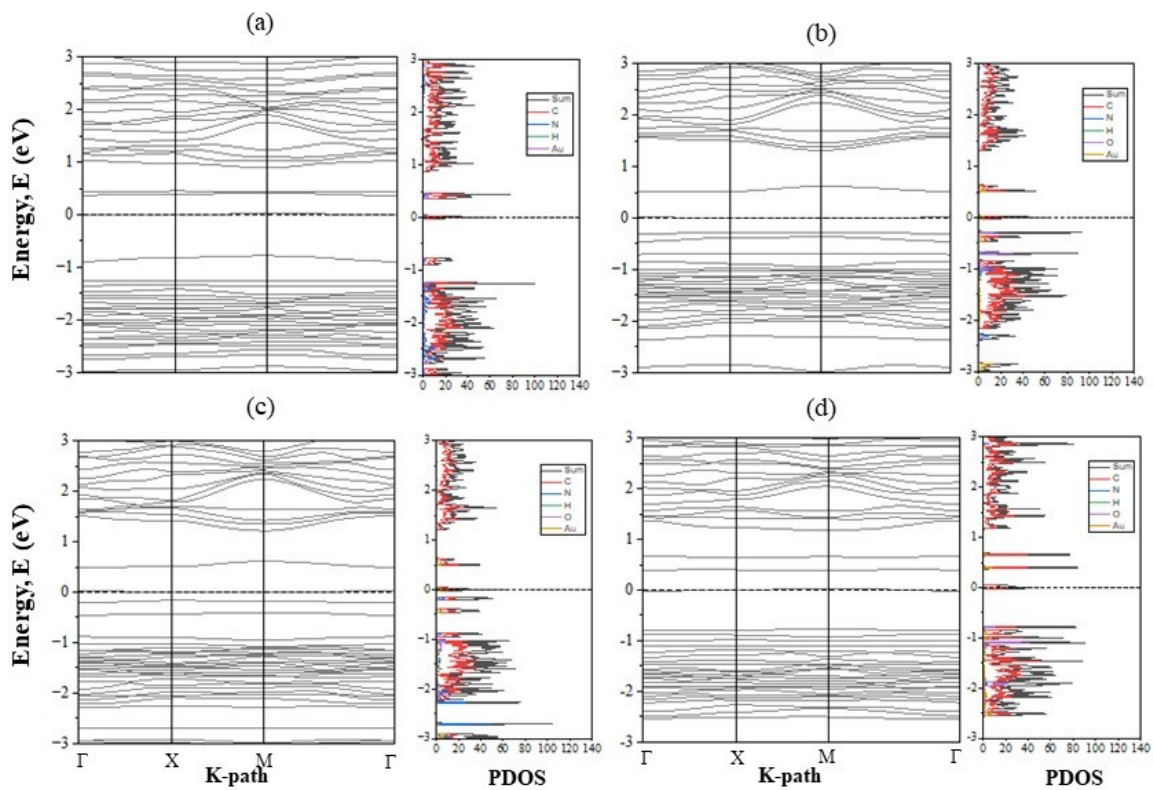

Fig. S14. Total electronic band structure and PDOS of (a) PG-Au-Adenine (b) PG-Au-Guanine (c) PG-Au-Cytosine and (d) PG-Au-Thymine.

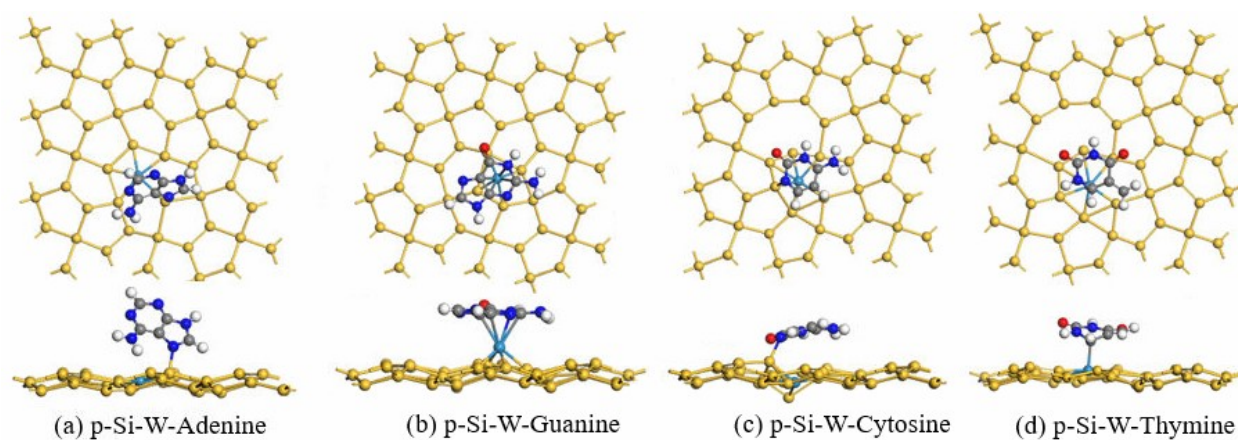

Fig. S15. Top and side views of the optimized configurations of single nucleobases (a: Adenine; b: Guanine; c: Cytosine; d: Thymine) on Tungsten (W) functionalized p-Si sheet. (gray sphere is C atom; white sphere is H atom; red sphere is O atom; blue sphere is N atom; teal sphere is W atom).

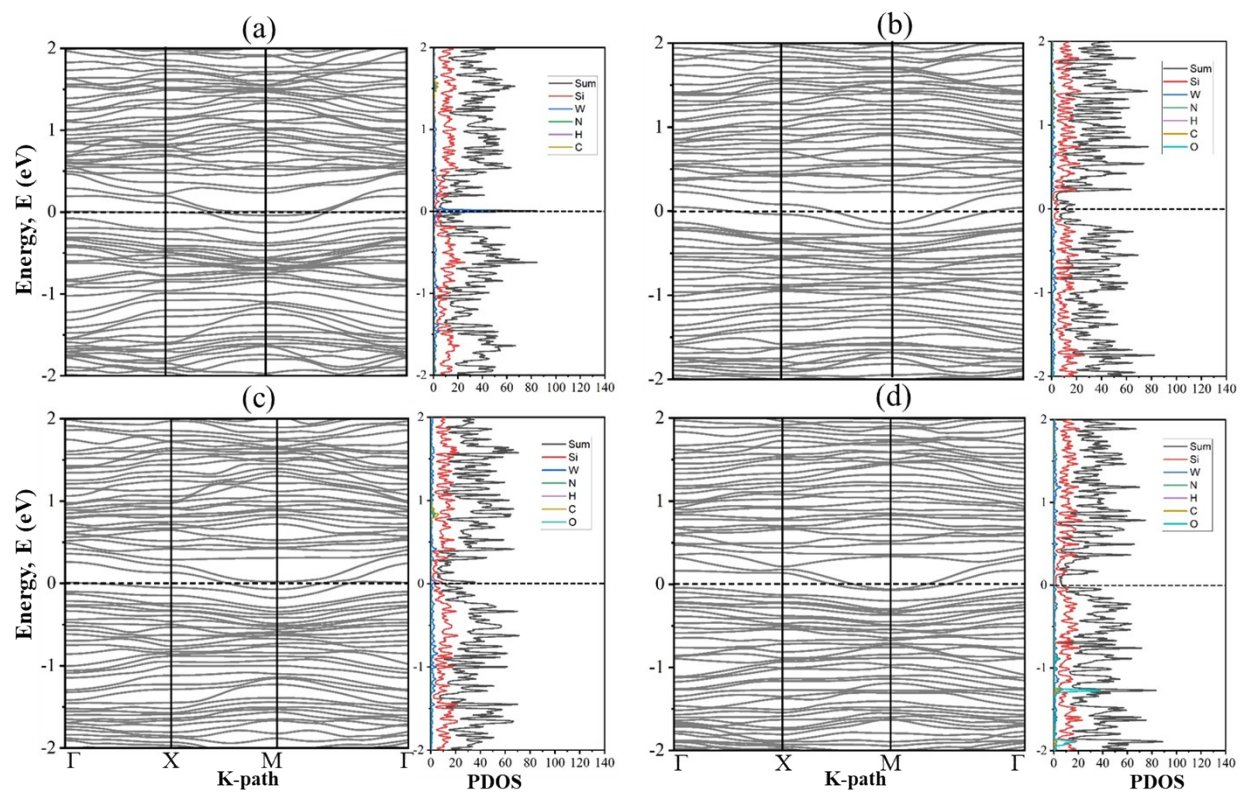

Fig. S16. Total electronic band structure and PDOS of (a) p-Si-W-Adenine (b) p-Si-W-Cytosine (c) p-Si-W-Guanine (d) p-Si-W-Thymine.
